# Supplementary material for: RNA-controlled nucleocytoplasmic shuttling of mRNA decay factors regulates mRNA synthesis and a novel mRNA decay pathway
Source: PubMed Central journal article supplement (PMC9684461; doi:10.1038/s41467-022-34417-z), 2022-11-23
Supplement: 41467_2022_34417_MOESM3_ESM.pdf [file 41467_2022_34417_MOESM3_ESM.pdf]

## **Description of Additional Supplementary Files**

File Name: Supplementary Data 1

Description: Yeast strains used in the study

File Name: Supplementary Data 2

Description: Plasmids used in the study

File Name: Supplementary Data 3

Description: Genomic run-on (GRO) of delta KAP120 and NLSs mutants experiment

File Name: Supplementary Data 4

Description: List of genes across bins and corresponding Kis values

File Name: Supplementary Data 5

Description: Names of differentially expressed genes related to starvation exit

File Name: Supplementary Data 6

Description: Mass Spectrometry results of Xrn1 WT and mutant interactome

File Name: Supplementary Data 7

Description: Gating strategy of the Flow cytometry experiment
