# Supplementary material for: RNA-controlled nucleocytoplasmic shuttling of mRNA decay factors regulates mRNA synthesis and a novel mRNA decay pathway
Source: PubMed Central journal article supplement (PMC9684461; doi:10.1038/s41467-022-34417-z), 2022-11-23
Supplement: 41467_2022_34417_MOESM10_ESM.pdf [file 41467_2022_34417_MOESM10_ESM.pdf]

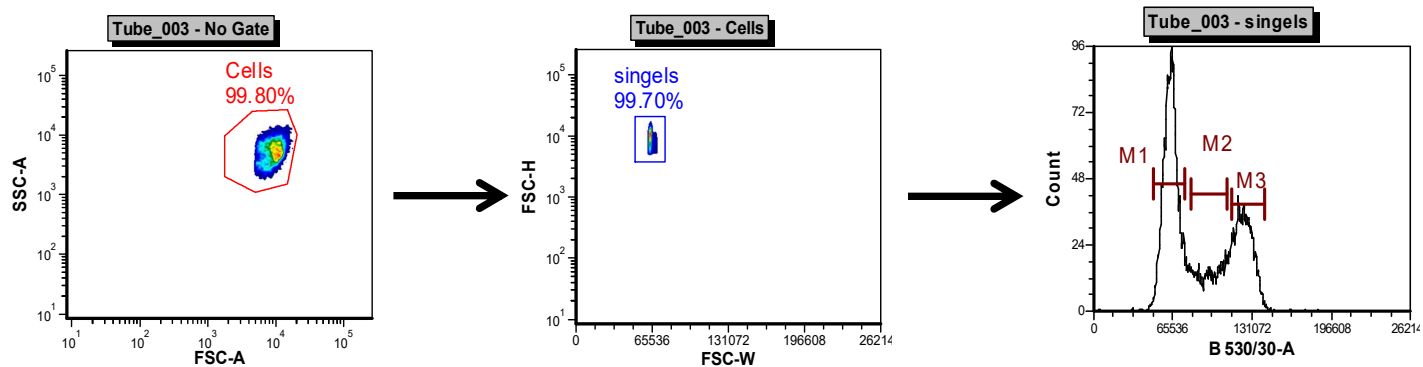

**Supplementary Data 7. Gating strategy.** Individual budding yeast cells was distinguished from debris and aggregates by examining FSC-A vs SSC-A, followed by FSC-W vs FSC-H was used to exclude doublets
